# Supplementary material
Source: Elsevier journal article supplement (https://www.sciencedirect.com/science/article/pii/S1134248X17301027)
Supplement: mmc1 [file S1134248X17301027:mmc1.docx]

ANEXO 1 **PROTOCOLO DE RECOGIDA DE DATOS**

Número Historia Clínica, Edad, Sexo.

Diagnóstico.

Estado Civil: Soltero, Casado, Separado, Viudo

Cuidador Principal: Conyuge, Hijos, Familiar, Amigos, Cuidador contratado, No tiene

Lugar donde reside: Urbano/Ciudad

Nivel de Estudios: sin estudios, primarios, secundarios, universidad

Situación laboral: empleado, autónomo, ama de casa, desempleado, jubilado

Espiritualidad :Si/No, Religiosidad. Si/no, Tipo de religión, Práctica : Si/No, Grado de ayuda de la religión

Nivel de Espiritualidad: Nada, Poco, Bastante, Mucho, Total

Grado de información: No conoce diagnóstico, No conoce pronóstico, no conoce diagnóstico ni pronóstico, No quiere información

Conciencia de enfermedad: Si/No

Síndrome de Desmoralización: Distress, existencial, Pérdida de sentido, Desesperanza, Impotencia, Dificultad para hacer frente a la situación.

Termómetro de sufrimiento: 0-10 según EVA

**ESCALA HAD**

**A1.- Me siento tenso o nervioso**

**Todos los días 3 Muchas veces 2 A veces 1 Nunca 0**

**D2.- Todavía disfruto con lo que antes me gustaba**

**Como siempre 0 No lo bastante 1 Sólo un poco 2 Nada 3**

**A3.- Tengo una sensación de miedo como si algo grave me fuera a suceder**

**Definitivamente, es muy fuerte 3 Si pero no es muy fuerte 2 Un poco 1 Nada 0**

**D4.- Puedo reirme, ver el lado divertido de las cosas**

**Al igual que antes 0 No tanto 1 Casi nunca 2 Nunca 3**

**A5.- Tengo mi mente llena de preocupaciones**

**La mayoría de las veces 3 Bastante frecuente 2 A veces 1 No muy a menudo 0**

**D6.- Me siento alegre**

**Nunca 3 No muy a menudo 2 A veces 1 Casi siempre 0**

**A7.- Puedo estar sentado tranquilamente y sentirme relajado**

**Siempre 0 Por lo general 1 No muy a menudo 2 Nunca 3**

**D8.- Me siento como si cada día estuviera más lento**

**En todo momento 3 Muy a menudo 2 A veces 1 Nunca 0**

**A9.- Tengo una sensación extraña, como aleteo en el estómago**

**Nunca 0 En ciertas ocasiones 1 Con bastante frecuencia 2 Muy a menudo 3**

**D10.- He perdido el interés por mi aspecto personal**

**Totalmente 3 No me preocupo como debiera 2 Podría tener un poco más de cuidado 1 Igual que siempre 0**

**A11.- Me siento inquieto como si no pudiera parar de moverme**

**Mucho 3 Bastante 2 No mucho 1 Nunca 0**

**D12.- Me siento optimista respecto al futuro**

**Igual que siempre 0 Menos 1 Mucho menos 2 Nada 3**

**A13.- Me asaltan sentimientos repentinos de pánico**

**Muy frecuente 3 Bastante a menudo 2 A menudo 1 Nada 0**

**D14.- Me distraigo con un libro, radio o tv**

**A menudo 0 A veces 1 No muy a menudo 2 Nada 3**

**ESCALA FUNCIONAL PALIATIVA/PALLIATIVE PERFORMANCE SCALE PPS**

| **%** | **Deambulación** | **Actividad**  **Evidencia de Enfermedad** | **Autocuidado** | **Ingesta** | **Nivel de conciencia** |
| --- | --- | --- | --- | --- | --- |
| **100** | **completa** | **Actividad normal Sin evidencia de enfermedad** | **Completo** | **Normal** | **Normal** |
| **90** | **completa** | **Activdad normal. Alguna evidencia** | **Completo** | **Normal** | **Normal** |
| **80** | **completa** | **Actividad normal con esfuerzo. Alguna evidencia** | **Completo** | **Normal o reducida** | **Normal** |
| **70** | **Reducida** | **Incapaz de realizar actividad laboral normal. Alguna evidencia** | **Completo** | **Normal o reducida** | **Normal** |
| **60** | **Reducida** | **Incapaz de realizar tareas del hogar. Enfermedad significativa** | **Precisa asistencia ocasional** | **Normal o reducida** | **Normal o sd confusional** |
| **50** | **Vida cama sillón** | **Incapaz para realizar cualquier tipo de trabajo**  **Enfermedad extensa** | **Considerable asistencia** | **Normal o reducida** | **Normal o sd confusional** |
| **40** | - **Tiempo en cama** | **Incapaz para realizar cualquier tipo de trabajo. Enfermedad extensa** | **Ayuda para casi todas las actividades** | **Normal o reducida** | **Normal o somnoliento o sd confusional** |
| **30** | **Encamado** | **Incapaz para realizar cualquier trabajo. Enfermedad extensa** | **Total dependencia** | **Reducida** | **Normal o somnoliento o sd confusional** |
| **20** | **Encamado** | **Incapaz para realizar cualquier trabajo. Enfermedad extensa** | **Total dependencia** | **Capaz de beber solo a sorbos** | **Normal o somnoliento o sd confusional** |
| **10** | **Encamado** | **Incapaz para realizar cualquier trabajo. Enfermedad extensa** | **Total dependencia** | **Solo cuidados de la boca** | **Somnoliento o Coma** |
| **0** | **Éxitus** |  |  |  |  |
